# Supplementary material
Source: PubMed Central journal article supplement (PMC6638559)
Supplement: NIHMS1038209-supplement-Supplemental_Material.pdf [file NIHMS1038209-supplement-Supplemental_Material.pdf]

**Supplemental materials for:**

**Comparing Normalization Methods and the Impact of Noise**

Thao Vu,<sup>1</sup> Eli Riekeberg,<sup>2</sup> Yumou Qiu<sup>1</sup> and Robert Powers<sup>2,3,\*</sup>

<sup>1</sup>*Department of Statistics, University of Nebraska-Lincoln, Lincoln, NE USA 68583-0963*

<sup>2</sup>*Department of Chemistry, University of Nebraska-Lincoln, Lincoln, NE USA 68588-0304*

<sup>3</sup>*Nebraska Center for Integrated Biomolecular Communication*

**Table of Contents:**

**Figure S1.** Representative simulated spectra with added noise

**Figure S2.** Representative coffee spectra with added noise

**Figure S3.** Pearson correlation coefficient between estimated first loadings and true first loadings across eight simulated sets

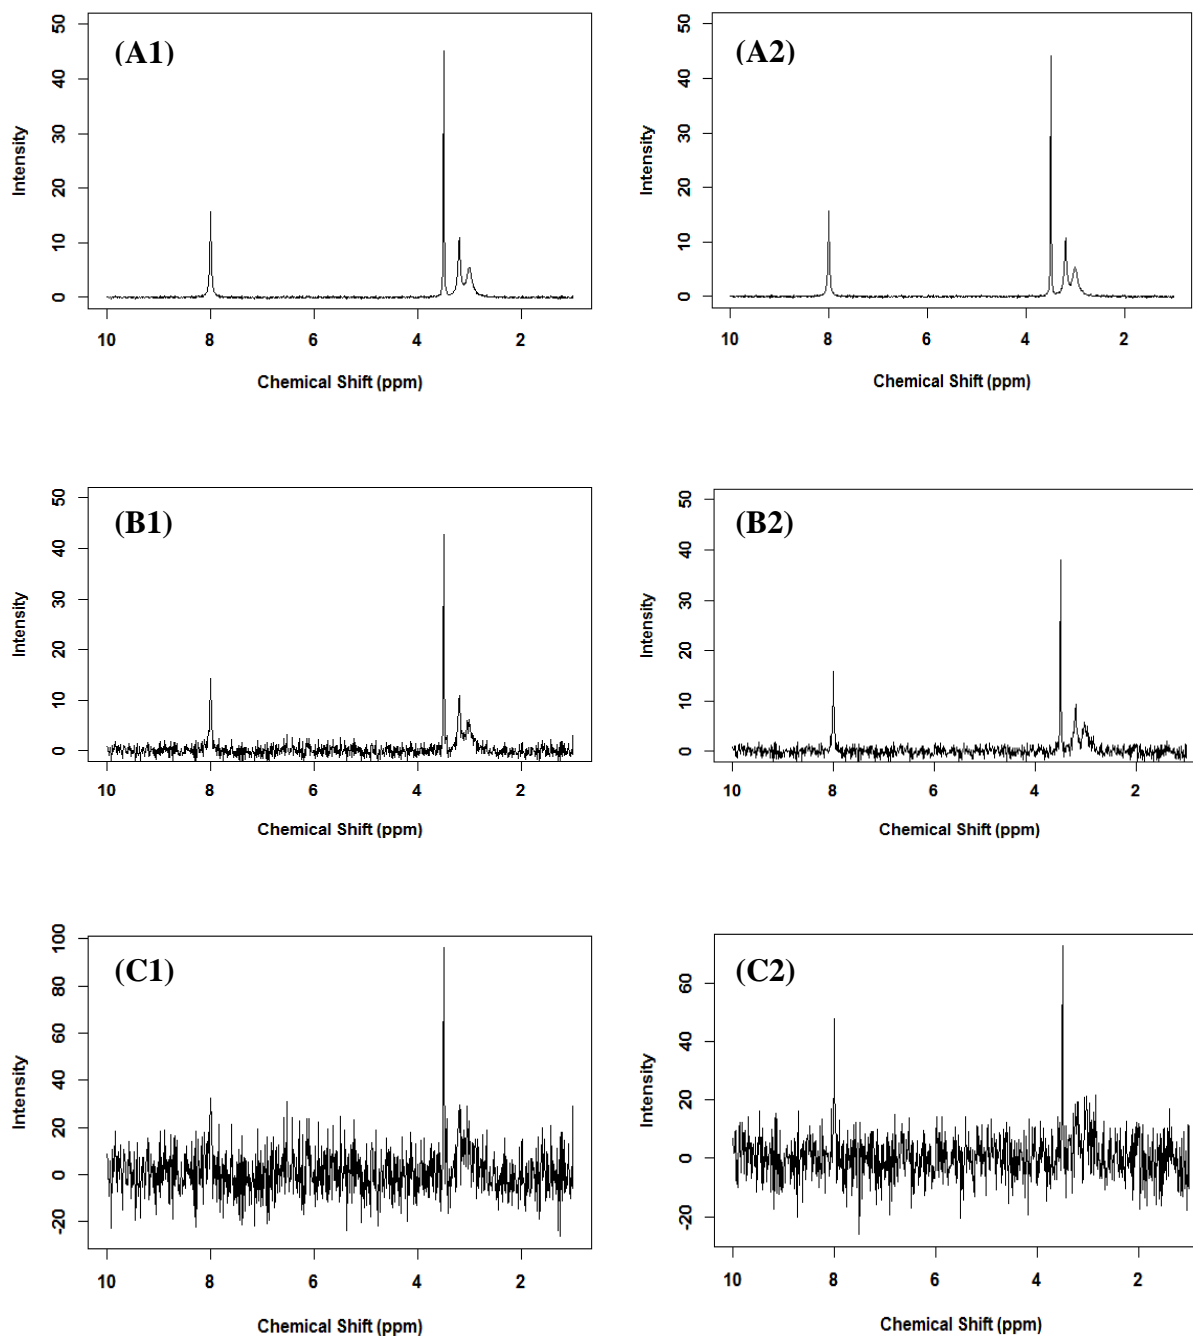

**Figure S1. Representative simulated spectra with added noise.** At modest level of added Gaussian noise (5%), (A1) and (A2) correspond to noisy spectra at the lower end and upper end of the dilution factor range (0.9, 1.1), respectively. At a medium level of added Gaussian noise (50%), (B1) and (B2) correspond to noisy spectra at the lower end and upper end of the dilution factor range (0.5, 1.5), respectively. At the highest level of added Gaussian noise (200%), (C1) and (C2) correspond to noisy spectra at the lower end and upper end of the dilution factor range (0.001, 5) respectively.

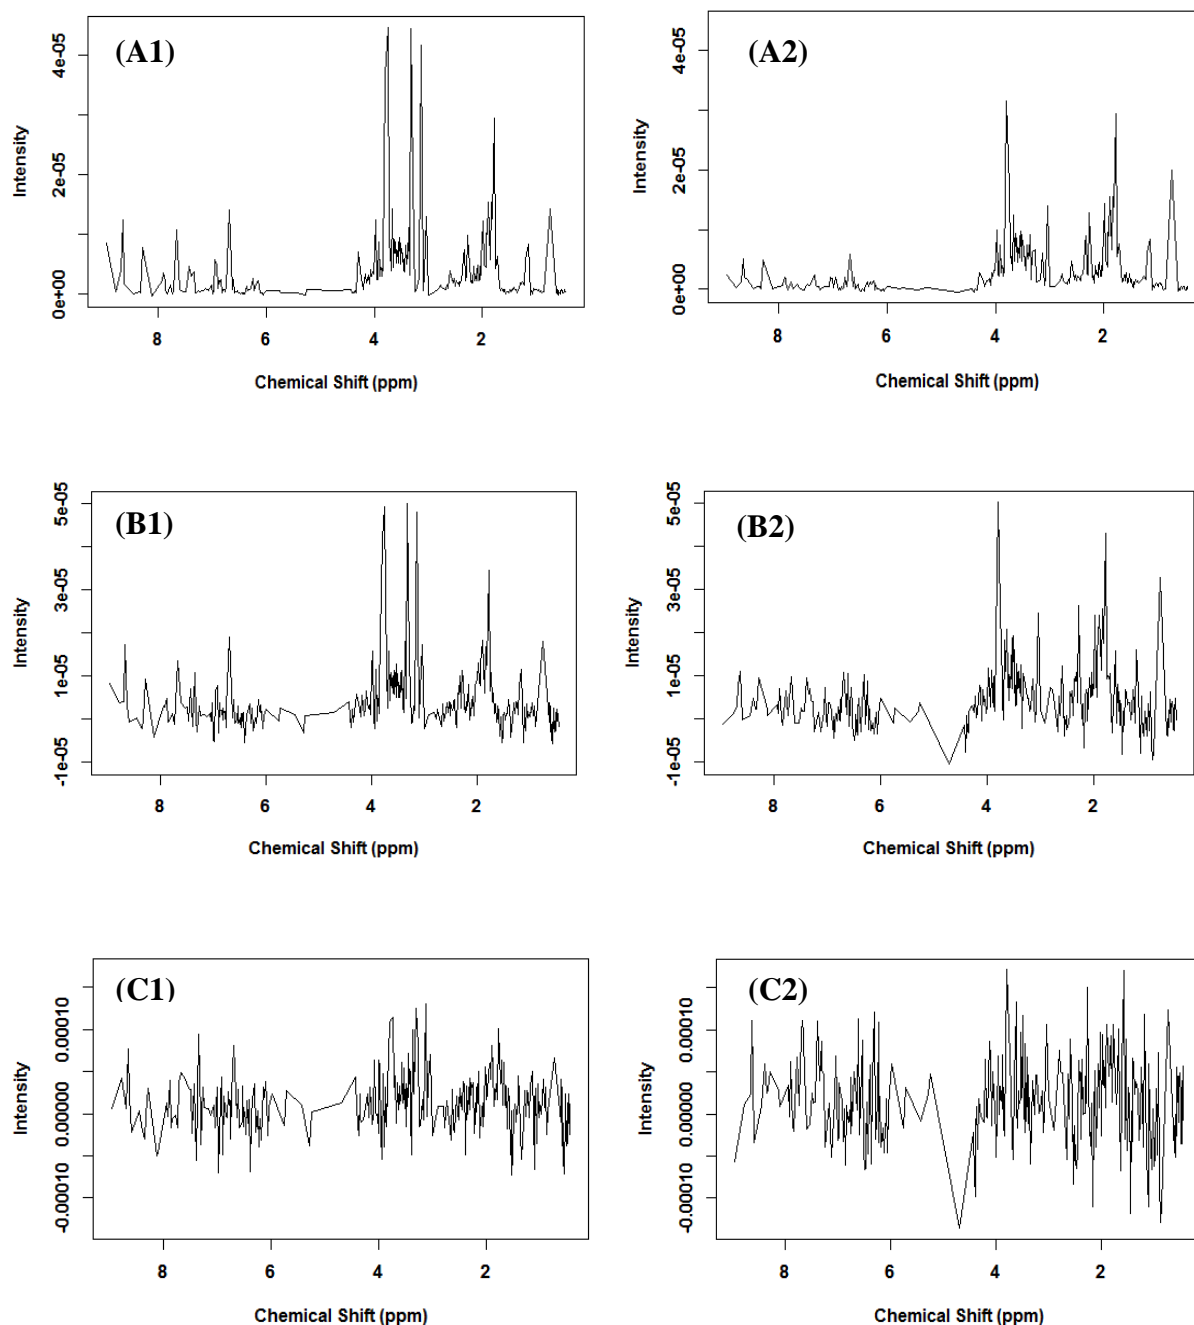

**Figure S2. Representative coffee spectra with added noise.** At modest level of added Gaussian noise (5%), (A1) and (A2) correspond to noisy spectra at the lower end and upper end of the dilution factor range (0.9, 1.1), respectively. At a medium level of added Gaussian noise (50%), (B1) and (B2) correspond to noisy spectra at the lower end and upper end of the dilution factor range (0.3, 1.7), respectively. At the highest level of added Gaussian noise (200%), (C1) and (C2) correspond to noisy spectra at the lower end and upper end of the dilution factor range (0.001, 5) respectively.

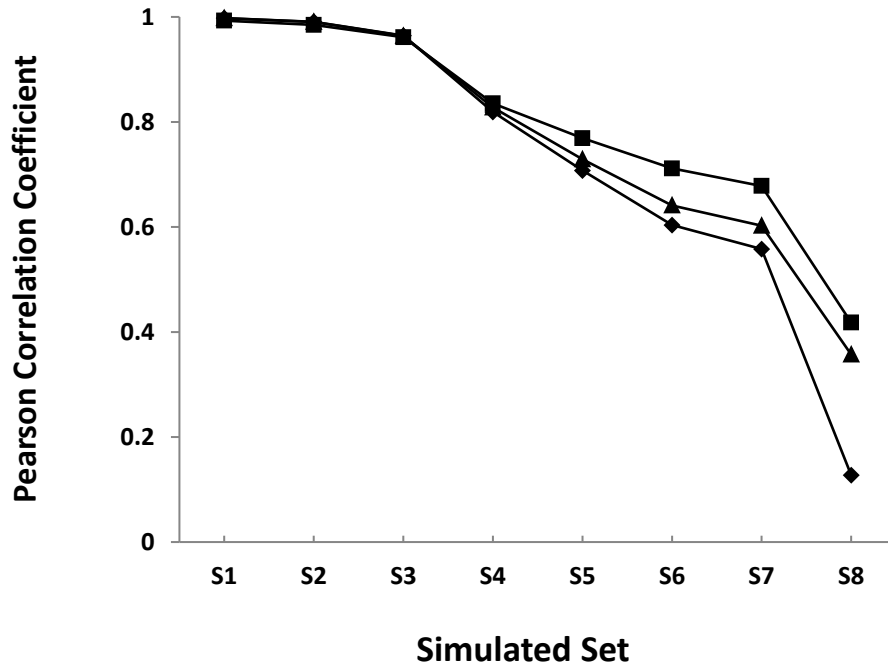

**Figure S3.** Pearson correlation coefficients between estimated first loadings and true first loadings of 8 simulated sets after being normalized with CS (♦), PQ (■), and ROI (▲) respectively. The amount of signal variance introduced into the coffees dataset is described in **Table 1**.
